# Supplementary material for: The School in Planned Social Change--Problem or Solution?.
Source: HighWire-hosted journal article supplement (doi:10.1101/gr.076521.108), 1987-01-01
Supplement: ortheus_supplement.zip [file agr_summary.xls]

## Sheet: Sheet1
gene_name	gene_id	protein_id	ancestor_score	best_extant	difference	best_species	anc_introns	source_introns	source_chr	source_start	source_end	anc_chr	anc_start	anc_end	all_extant	agr_id
FAM48A	ENSG00000102710	ENSP00000348512	752.85	584.66	168.19	human	0	25	13	36481453	36531850	X	24283453	24310009	(human,X,24283453,24310009)(cow,X,82077005,82104995)(rat,X,81252028,81287696)(dog,X,19846277,19875097)(mouse,X,90152992,90186372)	pseudo_53
ASNS	ENSG00000070669	ENSP00000175506	668.01	448.63	219.38	dog	0	13	7	97319379	97339732	13	99432093	99605680	(human,13,99432093,99605680)(cow,12,71289740,71417975)(dog,22,52895499,53032469)(rat,15,107608840,107704475)(mouse,14,121610636,121718237)	pseudo_1607
TATDN2	ENSG00000157014	ENSP00000287652	664.16	643.31	20.85	dog	1	7	3	10265372	10297900	X	43968094	44046856	(human,X,43968094,44046856)(dog,X,38156788,38231510)(rat,X,17021532,17106111)(mouse,X,16349965,16428434)	pseudo_296
TKTL2	ENSG00000151005	ENSP00000280605	776.28	702.16	74.12	dog	1	0	4	164612456	164614336	X	153169567	153209513	(human,X,153169567,153209513)(cow,X,31678706,31713835)(rat,X,160132717,160175472)(dog,X,125039492,125076254)(mouse,X,70414000,70459200)	pseudo_1077
PNPT1	ENSG00000138035	ENSP00000260604	403.08	265.25	137.83	human	1	27	2	55715971	55774463	7	121224671	121545954	(human,7,121224671,121545954)(cow,4,78596003,78945982)(dog,14,62679303,62950869)(rat,4,49194615,49519044)(mouse,6,22744083,23065190)	pseudo_721
GTF3A	ENSG00000122034	ENSP00000370532	304.39	291.65	12.74	human	0	9	13	26896681	26907823	7	14215339	15252045	(human,7,14215339,15252045)(cow,4,22725285,23925357)(rat,6,56337749,57416584)(dog,14,31923275,32861936)(mouse,12,38017853,39090870)	pseudo_1273
ERO1L	ENSG00000197930	ENSP00000352044	393.24	324.33	68.91	human	1	15	14	52178357	52232173	12	46376325	46882574	(human,12,46376325,46882574)(cow,5,32202839,32706127)(rat,7,136408893,136905478)(dog,27,9578022,10076653)(mouse,15,97524531,98015043)	pseudo_1369
NUDT9	ENSG00000170502	ENSP00000303575	477.67	425.22	52.45	human	0	7	4	88562759	88598519	10	92431663	92962379	(human,10,92431663,92962379)(cow,26,10223475,10794193)(dog,28,8375817,8806260)(rat,1,240072696,240605652)(mouse,19,35946507,36455717)	pseudo_878
ABCG2	ENSG00000118777	ENSP00000237612	394.1	308.73	85.37	human	1	15	4	89230441	89299035	2	228319105	228444704	(human,2,228319105,228444704)(cow,2,105149843,105256681)(rat,9,82370164,82487883)(dog,25,43456623,43548158)(mouse,1,82940364,83038869)	pseudo_1246
SUCLG2	ENSG00000172340	ENSP00000307432	198.51	116.84	81.67	cow	0	10	3	67507836	67787728	11	106932883	106968439	(human,11,106932883,106968439)(cow,15,11262453,11329496)(dog,5,27826249,27861578)	pseudo_969
MAN1B1	ENSG00000177239	ENSP00000360645	262.63	249.57	13.06	human	0	12	9	139101200	139123460	11	42747036	43175597	(human,11,42747036,43175597)(cow,15,68847392,69215880)(rat,3,78987699,79404999)(dog,18,29444820,29763222)(mouse,2,94332543,94764032)	pseudo_412
GTF2IRD2B	ENSG00000174428	ENSP00000308080	612.98	599.06	13.92	human	1	15	7	74146283	74203558	2	232036153	232503853	(human,2,232036153,232503853)(cow,2,108079925,108426710)(rat,9,85120078,85442851)(dog,25,46336737,46720857)(mouse,1,88189276,88506248)	pseudo_390
MRPL42	ENSG00000198015	ENSP00000351506	125.19	84.82	40.37	human	1	6	12	92385401	92420562	7	47006845	47034305	(human,7,47006845,47034305)(cow,4,67782679,67816725)(dog,16,3525709,3540794)(rat,14,88922455,88944918)(mouse,11,8071827,8102392)	pseudo_142
YY1	ENSG00000100811	ENSP00000262238	408.15	398.1	10.05	dog	0	4	14	99774855	99814557	X	21730495	21813473	(human,X,21730495,21813473)(cow,X,80982998,81052022)(rat,X,58652487,58759555)(dog,X,17566080,17647083)(mouse,X,152891917,152997781)	pseudo_1275
PPP1R2	ENSG00000184203	ENSP00000328178	180.61	143.25	37.36	rat	0	5	3	196722514	196751362	X	42459499	42567037	(human,X,42459499,42567037)(cow,X,72661213,72741001)(dog,X,36884710,36950590)(rat,X,19529620,19666508)(mouse,X,14164084,14311688)	pseudo_923
LAMP1	ENSG00000185896	ENSP00000333298	311.96	225.09	86.87	human	0	8	13	112999470	113025746	X	33295652	33418018	(human,X,33295652,33418018)(cow,X,73913466,74001276)(dog,X,28416349,28488346)	pseudo_235
FTH1	ENSG00000167996	ENSP00000273550	261.64	218.67	42.97	human	0	3	11	61488335	61491708	X	37075786	37200942	(human,X,37075786,37200942)(dog,X,31919957,32091853)(rat,X,64200912,64361765)(mouse,X,74702849,74868416)	pseudo_249
RPS27L	ENSG00000185088	ENSP00000331019	100.64	85.16	15.48	human	0	3	15	61232603	61236794	10	126668059	127193337	(human,10,126668059,127193337)(cow,26,40397395,40934370)(rat,1,192464203,192963305)(dog,28,37262150,37732116)(mouse,7,132826496,133296355)	pseudo_672
SLC40A1	ENSG00000138449	ENSP00000261024	298.1	205.17	92.93	dog	1	7	2	190133563	190153858	7	22862744	23064767	(human,7,22862744,23064767)(cow,4,32090362,32274380)(rat,4,6465223,6658775)(dog,14,39517130,39709365)(mouse,5,23362263,23571484)	pseudo_516
RPL7A	ENSG00000148303	ENSP00000361076	167.59	130.46	37.13	human	0	7	9	135204890	135208111	13	97172976	97472190	(human,13,97172976,97472190)(cow,12,69421617,69631207)(rat,15,105804535,106020902)(dog,22,50929670,51128876)(mouse,14,119840618,120082097)	pseudo_1276
SNX19	ENSG00000120451	ENSP00000265909	1542.75	1517.77	24.98	human	0	10	11	130250985	130291572	13	18364457	18398034	(human,13,18364457,18398034)(human,21,13788858,13822705)(human,18,14619896,14653034)	pseudo_667
ITGAX	ENSG00000140678	ENSP00000268296	430.27	365.06	65.21	dog	1	30	16	31274010	31301819	16	31142980	31216525	(human,16,31142980,31216525)(rat,1,187294558,187362983)(dog,6,19966081,20043199)(mouse,7,127801011,127892753)	pseudo_1244
SAP30L	ENSG00000164576	ENSP00000297109	79.07	57.72	21.35	dog	0	3	5	153805766	153816059	9	108872766	109132198	(human,9,108872766,109132198)(cow,8,88831189,89072440)(rat,5,73029827,73293505)(dog,11,65605751,65803795)(mouse,4,55166170,55411529)	pseudo_527
GTF2A2	ENSG00000140307	ENSP00000267869	123.11	110.54	12.57	human	0	5	15	57718357	57737011	9	1310103	1341714	(human,9,1310103,1341714)(rat,1,229318871,229354308)(dog,1,93179685,93209495)(mouse,19,25990870,26032949)	pseudo_984
AMZ2	ENSG00000196704	ENSP00000352976	269.58	246.37	23.21	dog	1	7	17	63755310	63776634	17	60399329	60445001	(human,17,60399329,60445001)(cow,19,62286626,62325767)(rat,10,98897037,98937305)(dog,9,18089505,18127535)(mouse,11,109208332,109245931)	pseudo_828
AADAC	ENSG00000114771	ENSP00000232892	154.02	121.2	32.82	mouse	1	4	3	153014551	153028966	3	152957787	152974135	(human,3,152957787,152974135)(rat,2,149329324,149353185)(dog,23,49364629,49404734)(mouse,3,60112915,60123967)	pseudo_1257
MAP1LC3B	ENSG00000140941	ENSP00000268607	95.65	76.44	19.21	human	0	3	16	85982907	85995883	18	50560857	51518369	(human,18,50560857,51518369)(cow,24,52085892,53121110)(dog,1,22974091,23823421)(rat,18,65933588,66820283)(mouse,18,69395932,70244960)	pseudo_1078
SERPINA9	ENSG00000170054	ENSP00000337133	313.64	300.5	13.14	dog	1	5	14	93998813	94012423	X	105087988	105170806	(human,X,105087988,105170806)(dog,X,82554171,82645453)(mouse,X,134355236,134432830)	pseudo_1334
OR2K2	ENSG00000171133	ENSP00000363550	355.34	340.8	14.54	cow	0	0	9	113129584	113130621	9	113131735	113396403	(human,9,113131735,113396403)(cow,8,83894114,84089105)(rat,5,76807834,77025554)(dog,11,69062923,69237906)(mouse,4,58879174,59077014)	pseudo_956
WDR40A	ENSG00000198876	ENSP00000355114	508.69	486.06	22.63	cow	0	8	9	34076386	34124183	X	125511705	125654621	(human,X,125511705,125654621)(cow,X,6710289,6817336)(rat,X,91538,178790)(mouse,X,41031850,41178377)	pseudo_1265
GAPDH	ENSG00000111640	ENSP00000229239	182.77	161.79	20.98	dog	0	8	12	6513872	6517786	X	108384947	108611798	(human,X,108384947,108611798)(cow,X,40580994,40815076)(dog,X,85600161,85833331)(rat,X,36367661,36617623)(mouse,X,137225189,137443182)	pseudo_360
Table as in paper.
Source gene	Ancestor bit score	Best AGR region bit score	Difference (bits)	Best extant species	Introns in source gene	Introns in AGR	Source Gene Chr.	Human Chr. Of AGR
FAM48A	752.85	584.66	168.19	human	25	0	13	X
ASNS	668.01	448.63	219.38	dog	13	0	7	13
TATDN2	664.16	643.31	20.85	dog	7	1	3	X
TKTL2	776.28	702.16	74.12	dog	0	1	4	X
PNPT1	403.08	265.25	137.83	human	27	1	2	7
GTF3A	304.39	291.65	12.74	human	9	0	13	7
ERO1L	393.24	324.33	68.91	human	15	1	14	12
NUDT9	477.67	425.22	52.45	human	7	0	4	10
ABCG2	394.1	308.73	85.37	human	15	1	4	2
SUCLG2	198.51	116.84	81.67	cow	10	0	3	11
MAN1B1	262.63	249.57	13.06	human	12	0	9	11
GTF2IRD2B	612.98	599.06	13.92	human	15	1	7	2
MRPL42	125.19	84.82	40.37	human	6	1	12	7
YY1	408.15	398.1	10.05	dog	4	0	14	X
PPP1R2	180.61	143.25	37.36	rat	5	0	3	X
LAMP1	311.96	225.09	86.87	human	8	0	13	X
FTH1	261.64	218.67	42.97	human	3	0	11	X
RPS27L	100.64	85.16	15.48	human	3	0	15	10
SLC40A1	298.1	205.17	92.93	dog	7	1	2	7
RPL7A	167.59	130.46	37.13	human	7	0	9	13
SNX19	1542.75	1517.77	24.98	human	10	0	11	13
ITGAX	430.27	365.06	65.21	dog	30	1	16	16
SAP30L	79.07	57.72	21.35	dog	3	0	5	9
GTF2A2	123.11	110.54	12.57	human	5	0	15	9
AMZ2	269.58	246.37	23.21	dog	7	1	17	17
AADAC	154.02	121.2	32.82	mouse	4	1	3	3
MAP1LC3B	95.65	76.44	19.21	human	3	0	16	18
SERPINA9	313.64	300.5	13.14	dog	5	1	14	X
OR2K2	355.34	340.8	14.54	cow	0	0	9	9
WDR40A	508.69	486.06	22.63	cow	8	0	9	X
GAPDH	182.77	161.79	20.98	dog	8	0	12	X
